# Supplementary material
Source: Springer Nature journal article supplement (https://www.springermedizin.de/resource/supplementary/12984_2011_338_MOESM7_ESM.pdf/9605808)

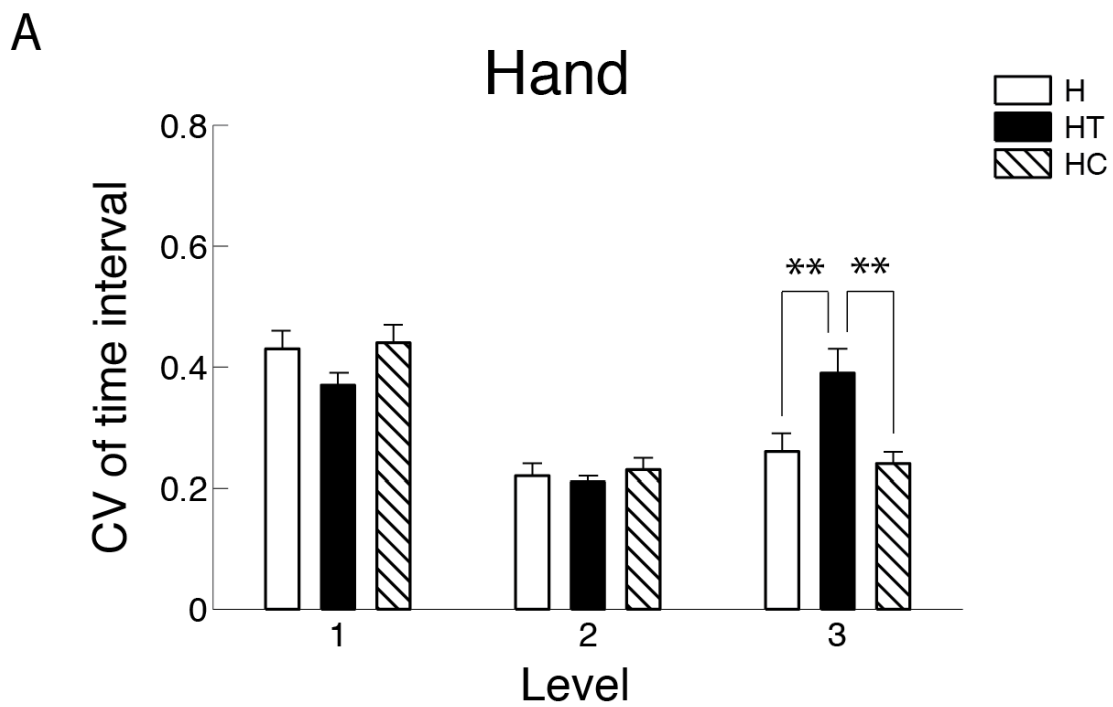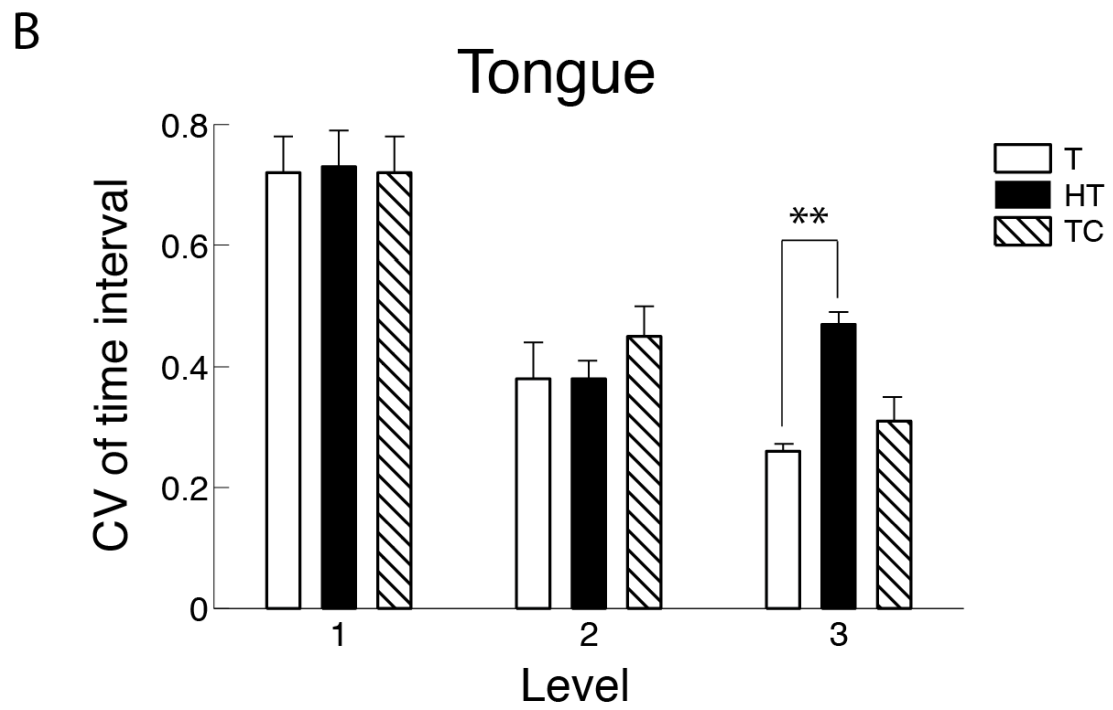

Figure 8

Supplement: MOESM7 [file 9605808]
